# Supplementary material
Source: publisher site journal article supplement (https://www.dovepress.com/get_supplementary_file.php?f=234241-S2.docx)
Supplement: Supplementary file 1 [file get_supplementary_file.php]

Table S2. Identified predictors of severe exacerbations from COX proportional hazards model, N=1438.

|  | HR | 95%CI | P Value |
| --- | --- | --- | --- |
| BMI＜21kg/m2 | 1.50 | (1.12, 2.01) | 0.0071 |
| Severe exacerbations history | 1.89 | (1.53, 2.33) | ＜0.001 |
| History of congestive heart failure | 2.42 | (1.56, 3.75) | 0.0001 |
| History of GERD | 1.24 | (1.02, 1.52) | 0.0300 |
| History of diabetes | 1.51 | (1.18, 1.93) | 0.0011 |
| History of asthma | 1.44 | (1.18, 1.76) | 0.0004 |
| Post-bronchodilator FEV1(% predicted) |  |  |  |
| ≥80 |  |  |  |
| 50-79 | 1.63 | (1.16, 2.27) | 0.0043 |
| 30-49 | 2.47 | (1.75, 3.48) | ＜0.001 |
| ＜30 | 3.13 | (2.12, 4.61) | ＜0.001 |
| CAT | 1.05 | (1.03, 1.06) | ＜0.001 |
| White blood cells ≥10×109/L | 1.36 | (1.04, 1.79) | 0.0256 |
